# Supplementary material for: Oxygen surface exchange properties and surface segregation behavior of nanostructured La0.6Sr0.4Co0.2Fe0.8O3−δ thin film cathodes
Source: Royal Society of Chemistry journal article supplement (doi:10.1039/c9cp00606k), 2019-01-01
Supplement: c9cp00606k1.pdf [file c9cp00606k1.pdf]

Table I. Summary of apparent  $k^*$  and  $D^*$  derived from SIMS profile fitting.

| Sample | YSZ orientation | GDC condition | Exchange $T$ °C | $k^*$ cm/s             | $D^*$ cm <sup>2</sup> /s |
|--------|-----------------|---------------|-----------------|------------------------|--------------------------|
| A      | (100)           | Annealed      | 600             | $0.66 \times 10^{-6}$  | $0.28 \times 10^{-8}$    |
| B      | (100)           | As-grown      | 600             | $1.34 \times 10^{-6}$  | $0.45 \times 10^{-8}$    |
| C      | (111)           | As-grown      | 600             | $7.33 \times 10^{-6}$  | $6.08 \times 10^{-8}$    |
| Bulk   | -               | -             | 600             | $0.083 \times 10^{-6}$ | $0.013 \times 10^{-8}$   |

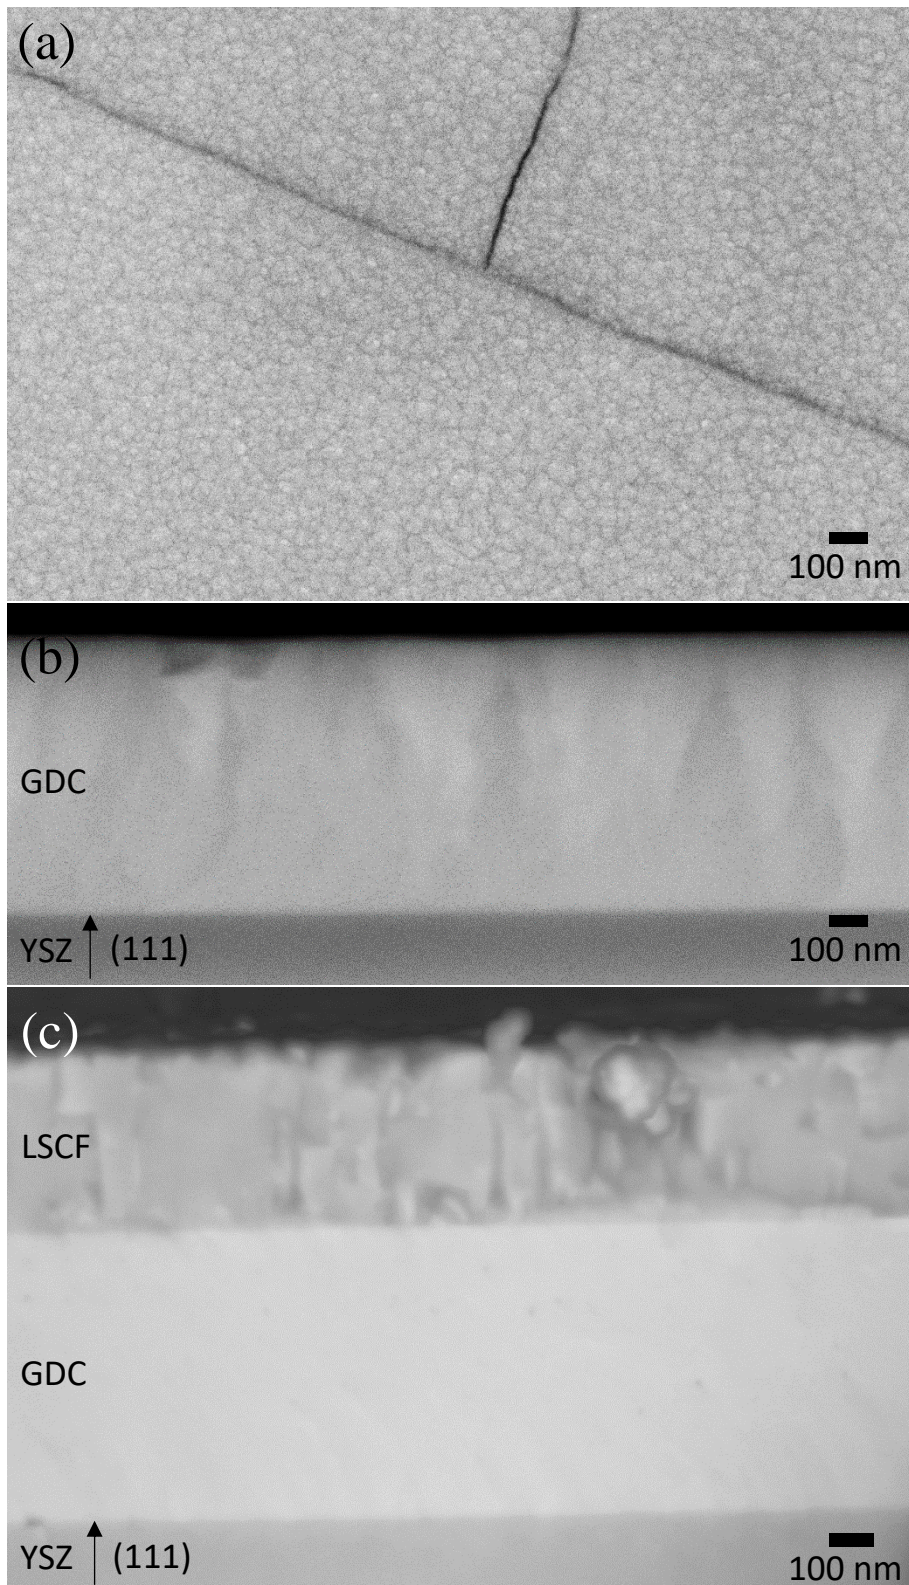

**Fig. S1.** Typical SEM images of as-grown GDC on (111) YSZ depicting the (a) surface morphology and (b) cross-section. Densification of the GDC layer after the deposition of the

LSCF layer is evident in the cross-sectional SEM image of Sample C (before long-term annealing) shown in (c).

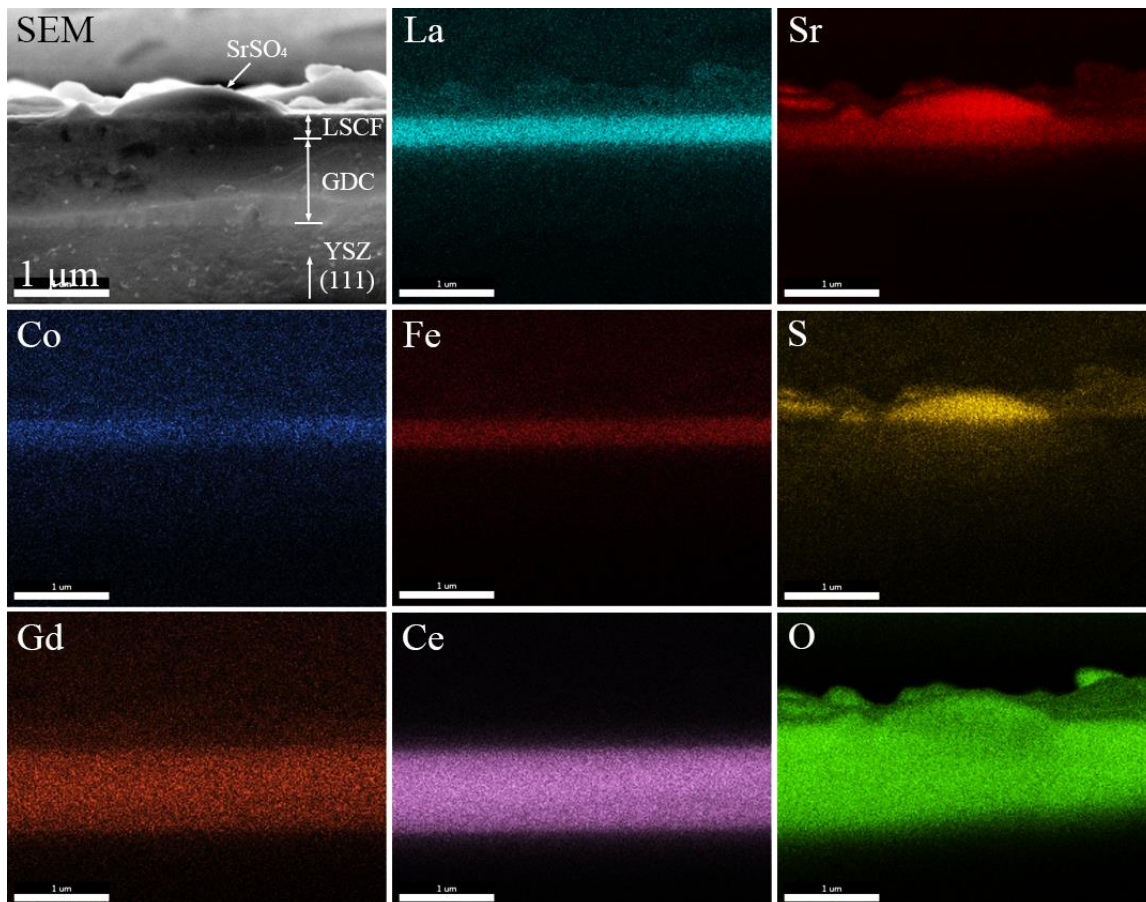

**Fig. S2.** Typical SEM-EDX elemental mapping results for a LSCF/as-grown GDC/(111) YSZ (Sample C) after annealing at 800 °C/1 month, revealing surface crystallites containing both Sr and S, which indicate SrSO<sub>4</sub> formation.

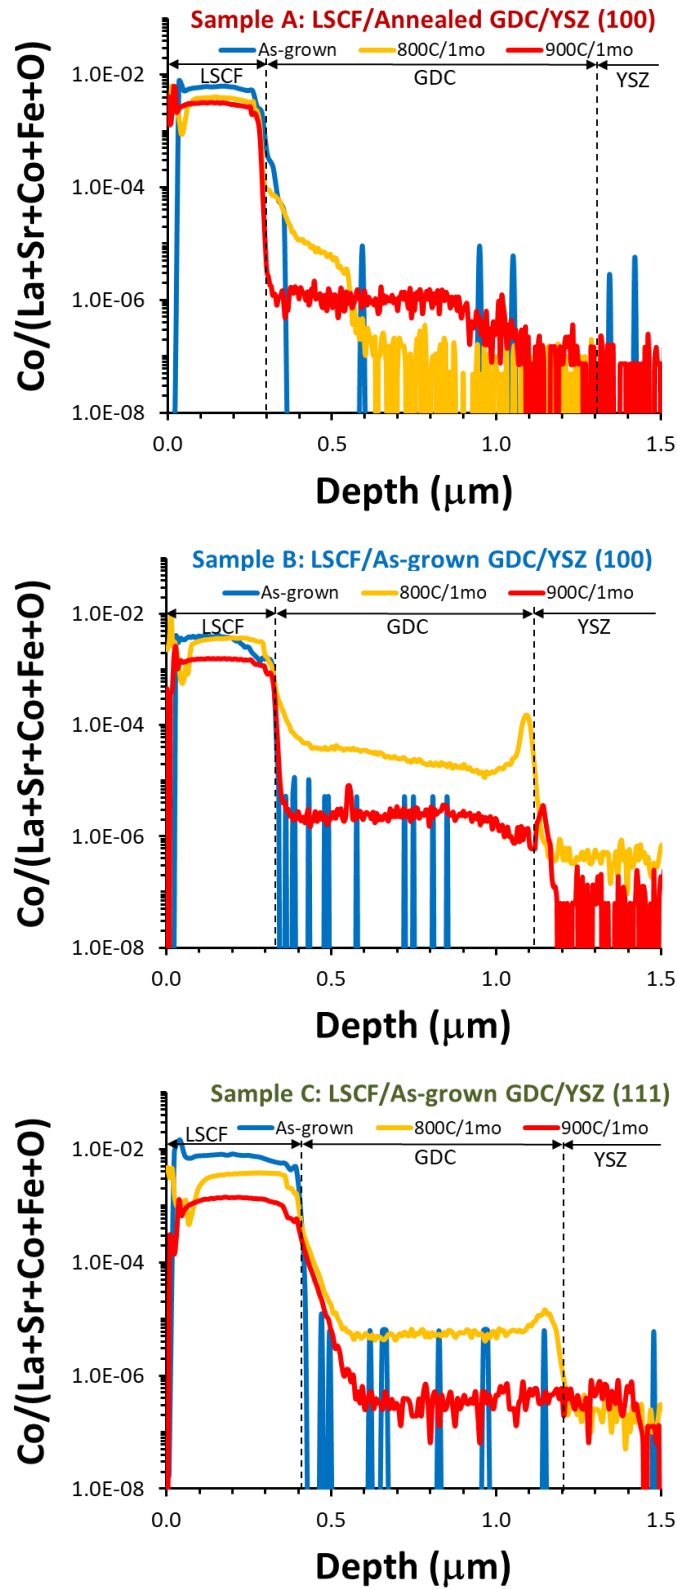

**Fig. S3.** Comparison of Co signals normalized by the total of secondary ion intensities as extracted from SIMS depth profile intensities for Samples A, B, and C, showing the as-grown as well as annealed samples.

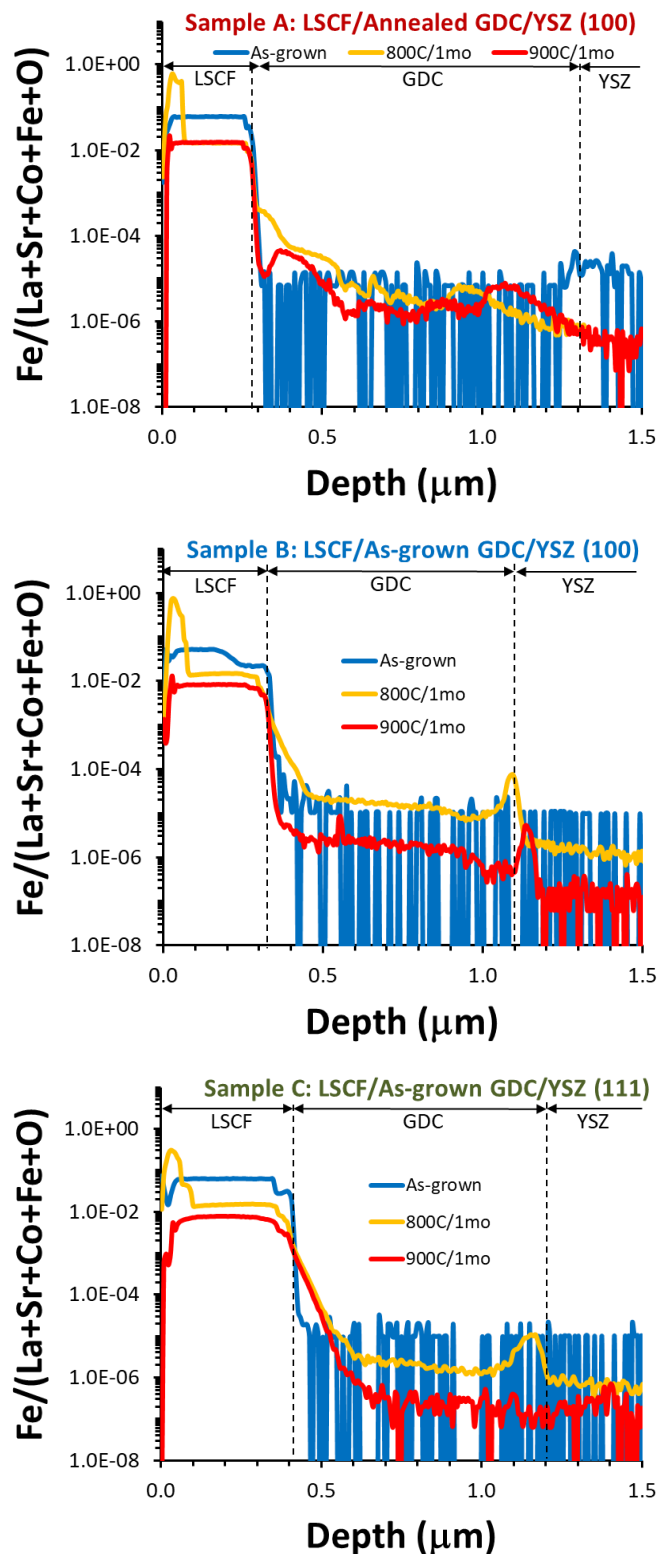

**Fig. S4.** Comparison of Fe signals normalized by the total of secondary ion intensities as extracted from SIMS depth profile intensities for Samples A, B, and C, showing the as-grown as well as annealed samples.
